# Supplementary material for: Case Report: A Novel Mutation in the Mitochondrial MT-ND5 Gene Is Associated With Leber Hereditary Optic Neuropathy (LHON)
Source: Frontiers journal article supplement (doi:10.3389/fneur.2021.652590), 2021-03-25
Supplement: Data_Sheet_2.pdf [file Data_Sheet_2.pdf]

# CARE Checklist of information to include when writing a case report

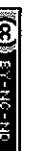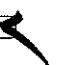

| Topic                                             | Item | Checklist item description                                                                                   | Reported on Line                                                    |
|---------------------------------------------------|------|--------------------------------------------------------------------------------------------------------------|---------------------------------------------------------------------|
| Title<br>Key Words<br>Abstract<br>(no references) | 1    | The diagnosis or intervention of primary focus followed by the words "case report" .....                     | 1-2                                                                 |
|                                                   | 2    | 2 to 5 key words that identify diagnoses or interventions in this case report, including "case report" ...   | 25-26                                                               |
|                                                   | 3a   | Introduction: What is unique about this case and what does it add to the scientific literature? .....        | 40-48                                                               |
|                                                   | 3b   | Main symptoms and/or important clinical findings. ....                                                       | 81-175                                                              |
| Introduction                                      | 3c   | The main diagnoses, therapeutic interventions, and outcomes. ....                                            | 168-175                                                             |
|                                                   | 3d   | Conclusion—What is the main "take-away" lesson(s) from this case? .....                                      | 211-213                                                             |
|                                                   | 4    | One or two paragraphs summarizing why this case is unique (may include references) .....                     | 211-213                                                             |
|                                                   | 5a   | De-identified patient specific information. ....                                                             | 81-175                                                              |
| Patient Information                               | 5b   | Primary concerns and symptoms of the patient. ....                                                           | 81-175                                                              |
|                                                   | 5c   | Medical, family, and psycho-social history including relevant genetic information. ....                      | 81-175                                                              |
|                                                   | 5d   | Relevant past interventions with outcomes. ....                                                              | 81-175                                                              |
|                                                   | 6    | Describe significant physical examination (PE) and important clinical findings. ....                         | 81-175                                                              |
| Clinical Findings                                 | 7    | Historical and current information from this episode of care organized as a timeline. ....                   | 81-175                                                              |
|                                                   | 8a   | Diagnostic testing (such as PE, laboratory testing, imaging, surveys). ....                                  | 81-175                                                              |
|                                                   | 8b   | Diagnostic challenges (such as access to testing, financial, or cultural) .....                              | not applicable                                                      |
|                                                   | 8c   | Diagnosis (including other diagnoses considered) .....                                                       | 168                                                                 |
| Diagnostic Assessment                             | 8d   | Prognosis (such as staging in oncology) where applicable. ....                                               | not applicable                                                      |
|                                                   | 9a   | Types of therapeutic intervention (such as pharmacologic, surgical, preventive, self-care). ....             | 168-170                                                             |
|                                                   | 9b   | Administration of therapeutic intervention (such as dosage, strength, duration) .....                        | 165                                                                 |
|                                                   | 9c   | Changes in therapeutic intervention (with rationale) .....                                                   | not applicable                                                      |
| Therapeutic Intervention                          | 10a  | Clinician and patient-assessed outcomes (if available) .....                                                 | not applicable                                                      |
|                                                   | 10b  | Important follow-up diagnostic and other test results. ....                                                  | 170-175                                                             |
|                                                   | 10c  | Intervention adherence and tolerability (How was this assessed?) .....                                       | 84-175                                                              |
|                                                   | 10d  | Adverse and unanticipated events. ....                                                                       | not applicable                                                      |
| Follow-up and Outcomes                            | 11a  | A scientific discussion of the strengths AND limitations associated with this case report .....              | 190-210                                                             |
|                                                   | 11b  | Discussion of the relevant medical literature with references. ....                                          | 41-78, 177-216                                                      |
|                                                   | 11c  | The scientific rationale for any conclusions (including assessment of possible causes). ....                 | 177-216                                                             |
|                                                   | 11d  | The primary "take-away" lessons of this case report (without references) in a one paragraph conclusion. .... | 211-213                                                             |
| Patient Perspective                               | 12   | The patient should share their perspective in one to two paragraphs on the treatment(s) they received. ....  | not applicable                                                      |
|                                                   | 13   | Did the patient give informed consent? Please provide if requested. ....                                     | Yes <input checked="" type="checkbox"/> No <input type="checkbox"/> |
